# Supplementary material for: Relationships between phytoplankton pigments and DNA- or RNA-based abundances support ecological applications
Source: Copernicus journal article supplement (doi:10.5194/egusphere-2024-3285), 2024-11-04
Supplement: Supplementary file 1 [file egusphere-2024-3285-supplement.pdf]

# **Relationships between phytoplankton pigments and DNA- or RNA-based abundances support ecological applications**

## **Supplementary Information**

Robert H. Lampe<sup>1,2</sup>, Ariel J. Rabines<sup>1,2</sup>, Steffaney M. Wood<sup>1,2,3</sup>, Anne Schulberg<sup>1,2</sup>, Ralf Goericke<sup>1</sup>, Pratap Venepally<sup>2</sup>, Hong Zheng<sup>2</sup>, Michael R. Stukel<sup>4</sup>, Michael R. Landry<sup>1</sup>, Andrew D. Barton<sup>1,5</sup>, Andrew E. Allen<sup>1,2</sup>

<sup>1</sup>Integrative Oceanography Division, Scripps Institution of Oceanography, University of California San Diego, La Jolla, CA, 92093 USA

<sup>2</sup>Microbial and Environmental Genomics, J. Craig Venter Institute, La Jolla, CA, 92037, USA

<sup>3</sup>Center for Marine Biotechnology and Biomedicine, Scripps Institute of Oceanography, University of California San Diego, La Jolla, CA, 92093 USA

<sup>4</sup>Earth, Ocean, and Atmospheric Science Department, Florida State University, Tallahassee, FL, 32304 USA

<sup>5</sup>Department of Ecology, Behavior and Evolution, University of California San Diego, La Jolla, CA, 92093 USA

*Correspondence to:* Andrew E. Allen (aallen@ucsd.edu)

**Figure S1.** (A) Temperature ( $^{\circ}\text{C}$ ) and (B) nitrate concentrations ( $\mu\text{mol L}^{-1}$ ) among seasons for the RNA samples.

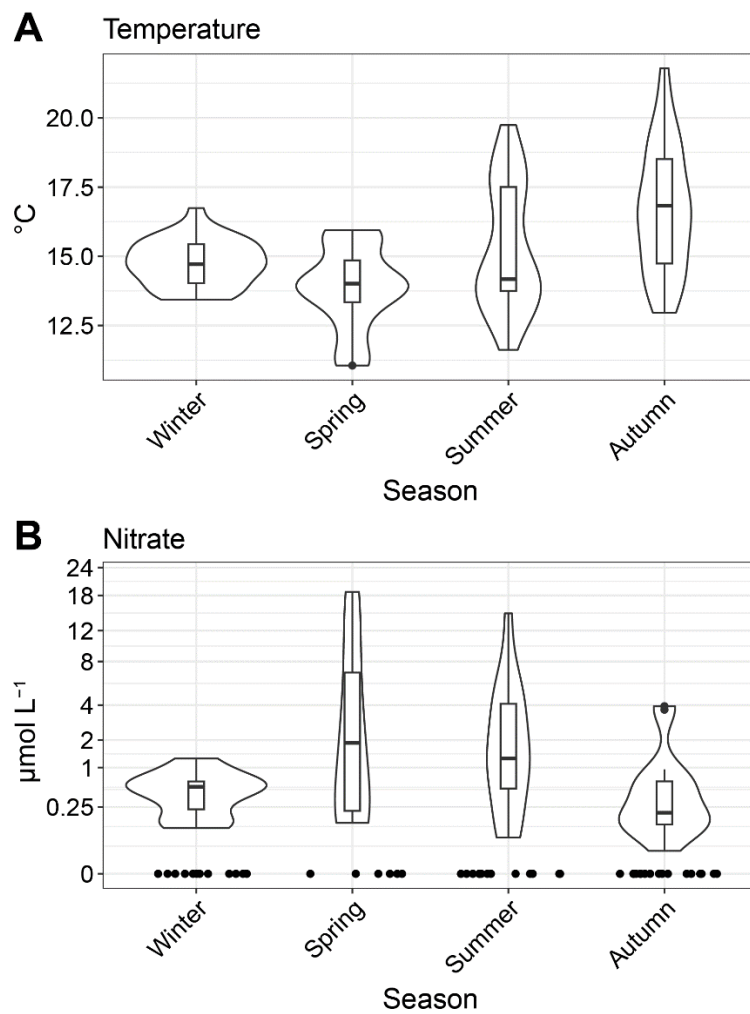

**Figure S2.** Cell abundances (cells mL<sup>-1</sup>) for *Prochlorococcus* (Pro) and *Synechococcus* (Syn) as (A) distributions and (B) sample-by-sample comparisons where the dashed line represents a one-to-one relationship.

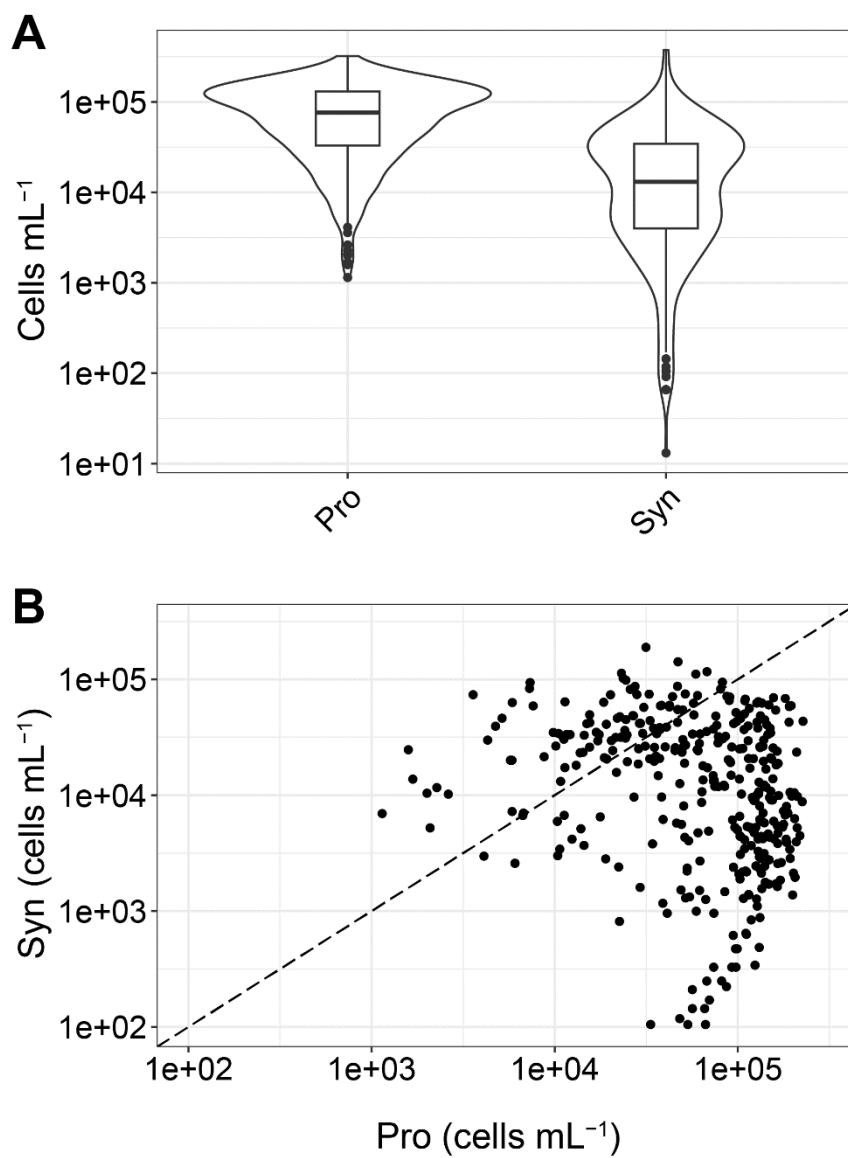

**Figure S3.** Pearson correlations among absolute abundances of phytoplankton groups and diagnostic pigments for (A) 18S-V4 and (B) 18S-V9 data. Correlations are not shown where  $P > 0.05$ .

### A. V4

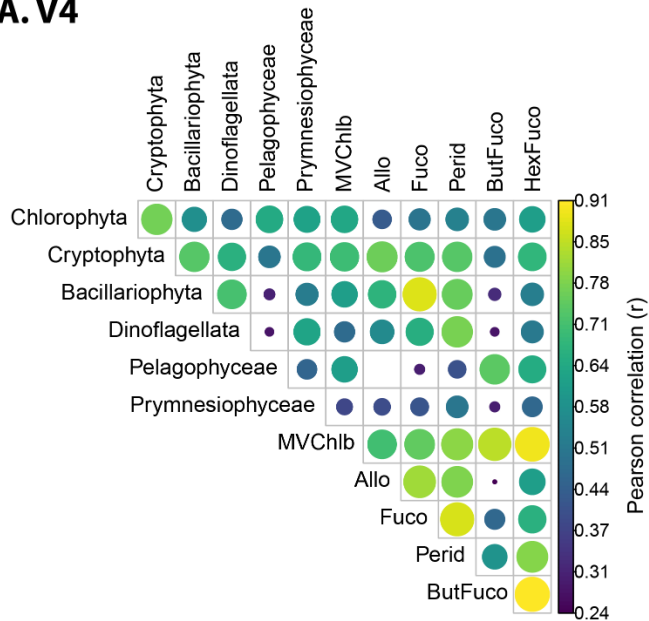

### B. V9

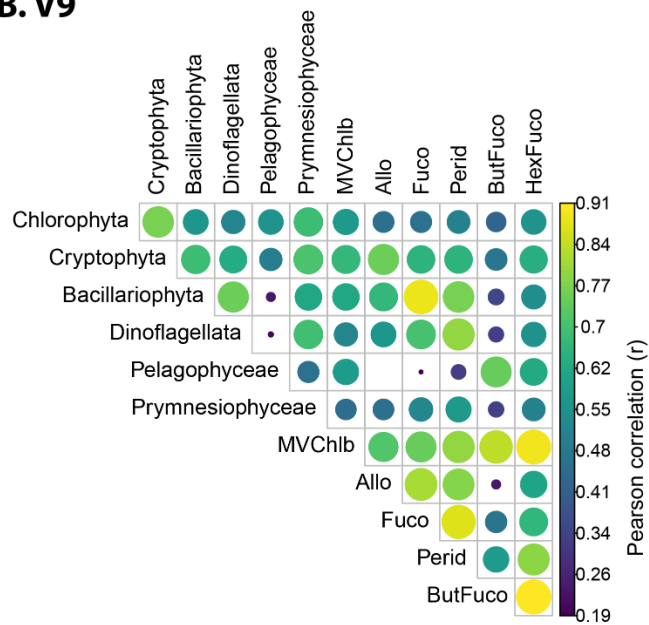

**Figure S4.** Correlations between 18S-V4 (red) or 18S-V9 (blue) absolute abundances (copies L<sup>-1</sup>) and taxon-specific contributions to total chlorophyll estimated with phytoclass (µg L<sup>-1</sup>) for each major eukaryotic phytoplankton group. Pearson correlations are significant ( $P < 0.05$ ) and coefficients are displayed in each panel. Lines with 95% confidence intervals shows linear models with significant relationships between variables ( $P < 0.05$ ).

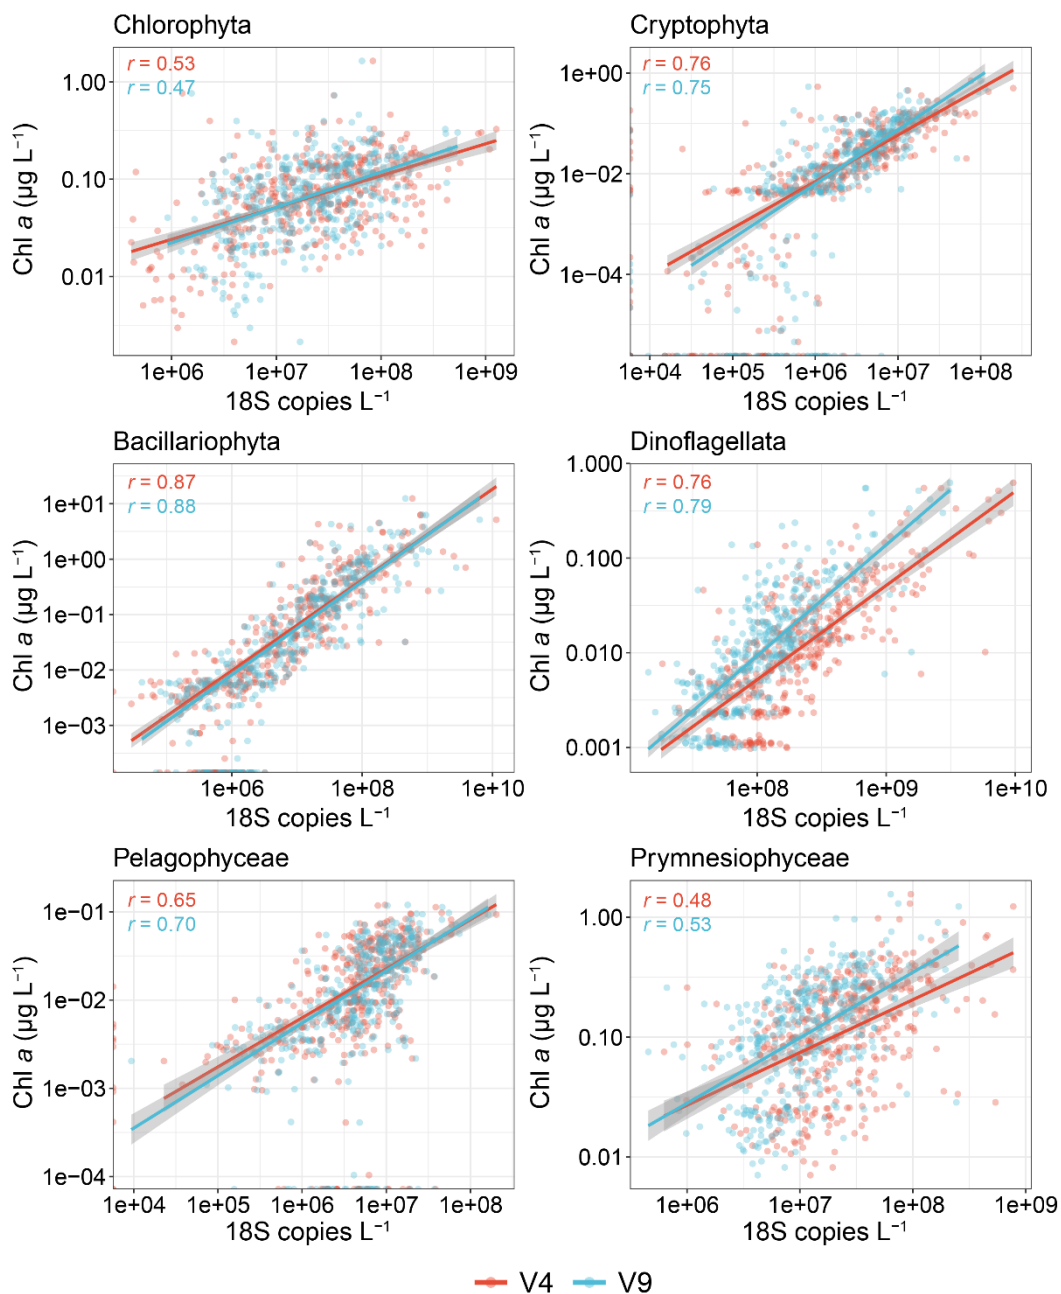

**Figure S5.** Linear regressions for depth (m) in predicting residuals from linear models on the absolute abundance and diagnostic pigments shown in Fig. 2B. Coefficients of determination ( $R^2$ ) and regression lines are shown when  $P < 0.05$ .

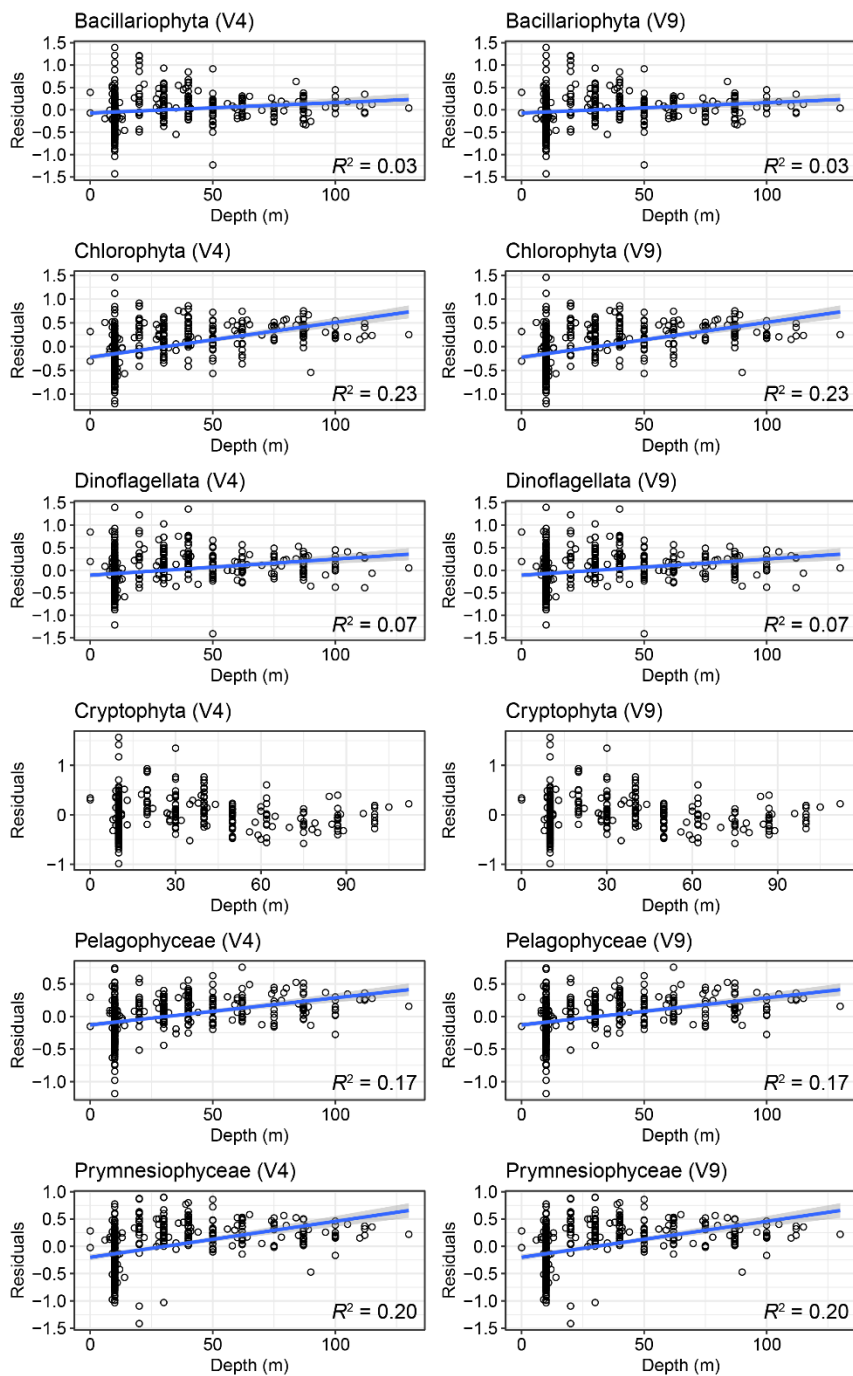

**Figure S6.** Relative abundances based on total copies L<sup>-1</sup> of Dinoflagellata ASVs on the (A) order level including Syndiniales and (B) genus level when Syndiniales are removed.

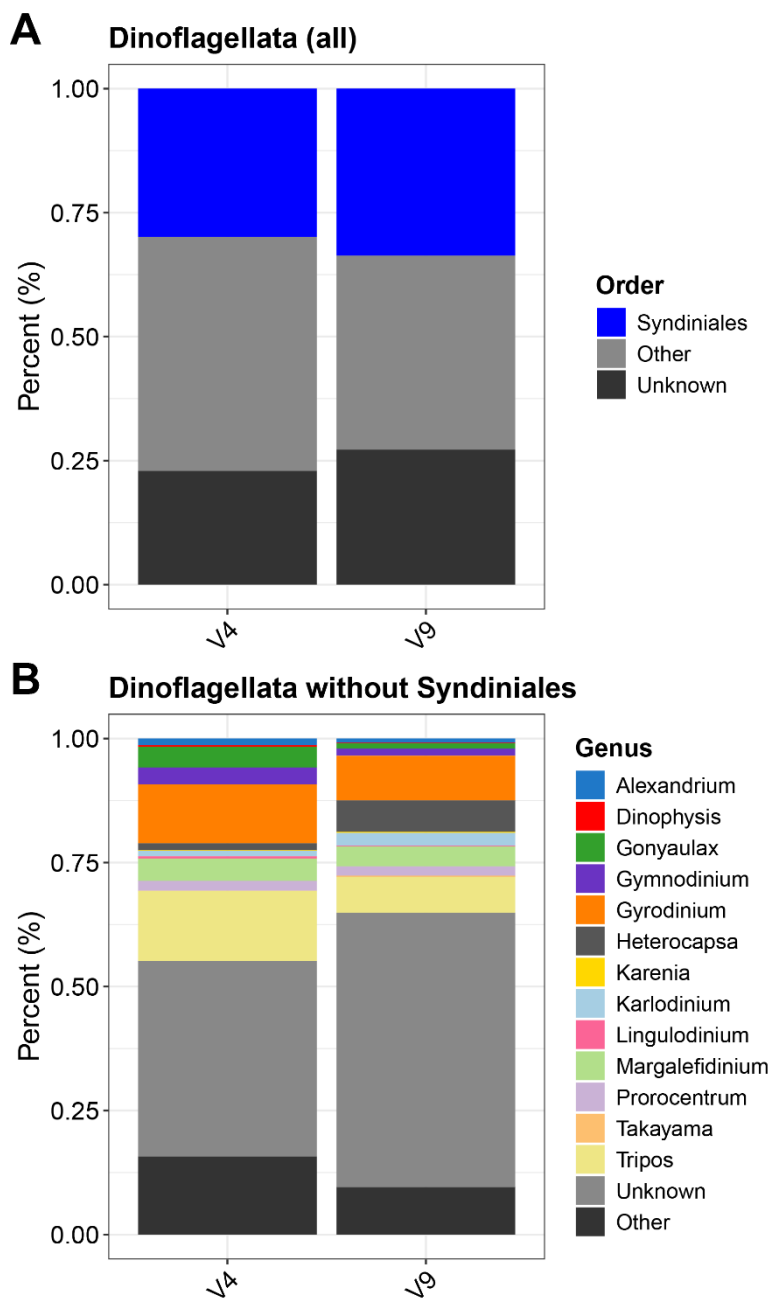

**Figure S7.** Correlations between diagnostic pigment concentrations and the absolute abundances of mRNA (transcripts L<sup>-1</sup>) for (A) all cyanobacteria and zeaxanthin and (B) *Prochlorococcus* and divinyl chlorophyll *a* (DVChla). Only samples from the upper 20 m are included. Pearson correlations are significant ( $P < 0.05$ ) and coefficients are displayed in each panel. Lines with 95% confidence intervals show linear models with significant relationships between variables ( $P < 0.05$ ).

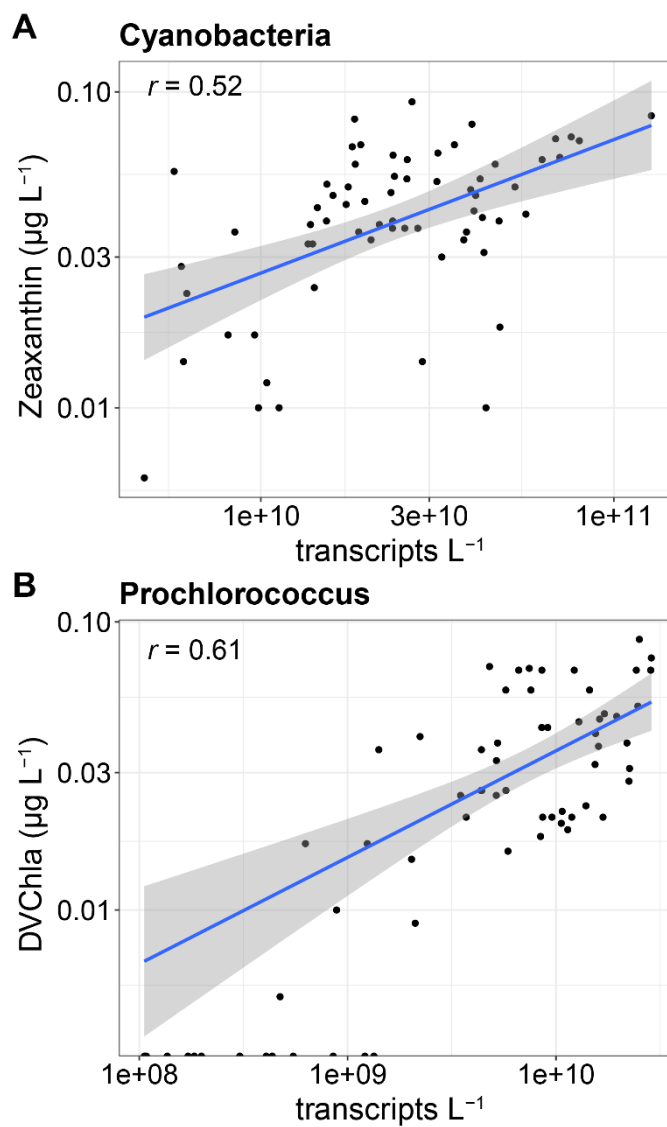



**Figure S8.** Productivity-diversity relationships in the region with net primary productivity (NPP) and both (a) the Shannon Index and (b) richness (ASVs) using both the 18S-V4 (red) and 18S-V9 (blue) data. Lines represent GAMs and corresponding 95% confidence intervals where significant ( $P < 0.05$ ). The deviance explained by each GAM is shown above each panel for each amplicon. (C-E) Environmental variables against total chlorophyll a concentrations coloured by near-surface (purple) or subsurface chlorophyll max (SCM, green) samples.

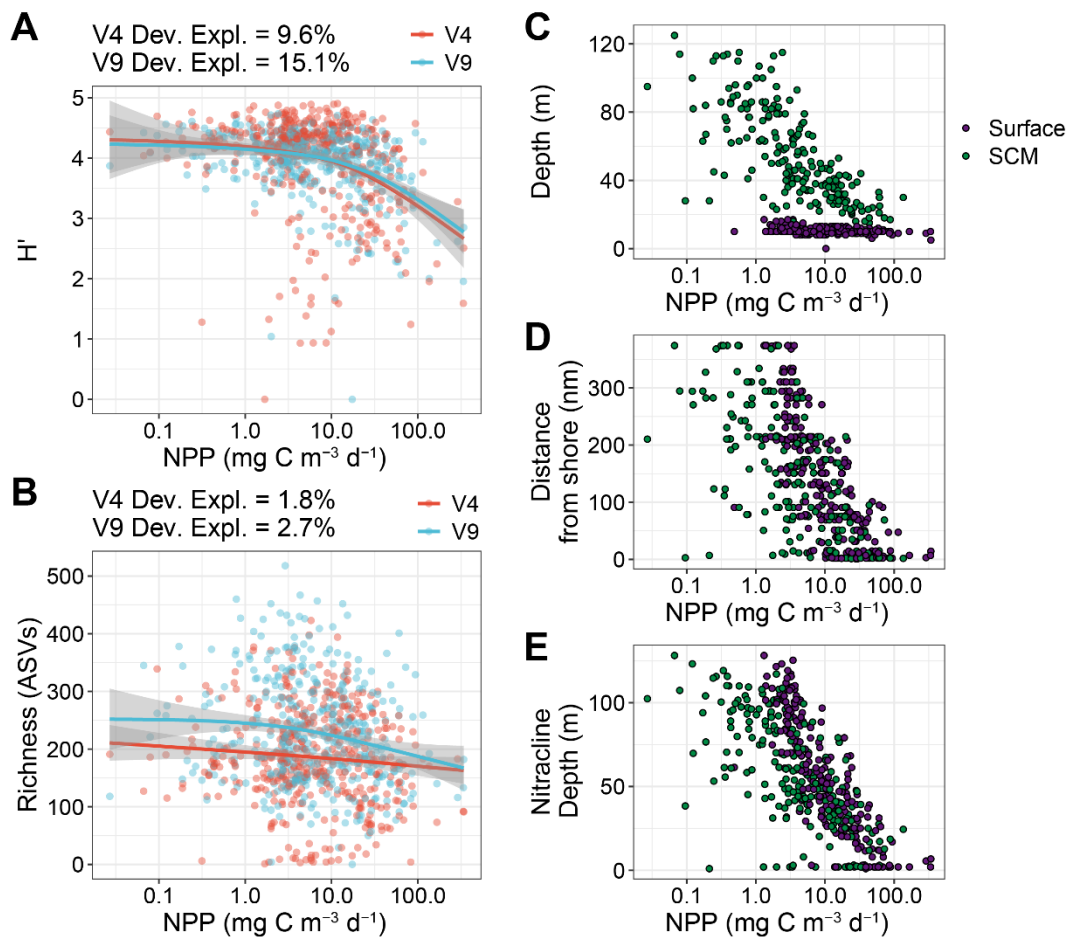

**Figure S9.** Productivity-diversity relationship in the region for (A) all eukaryotic phytoplankton groups or (B) all eukaryotic groups and cyanobacteria with biomass (chlorophyll a concentrations) as a proxy for productivity and diversity expressed as the richness (number of ASVs) for both the 18S-V4 (red) and 18S-V9 (blue) data. Lines represent significant GAMs and corresponding 95% confidence intervals ( $P < 0.05$ ). The deviance explained by each GAM is shown for each panel for each amplicon.

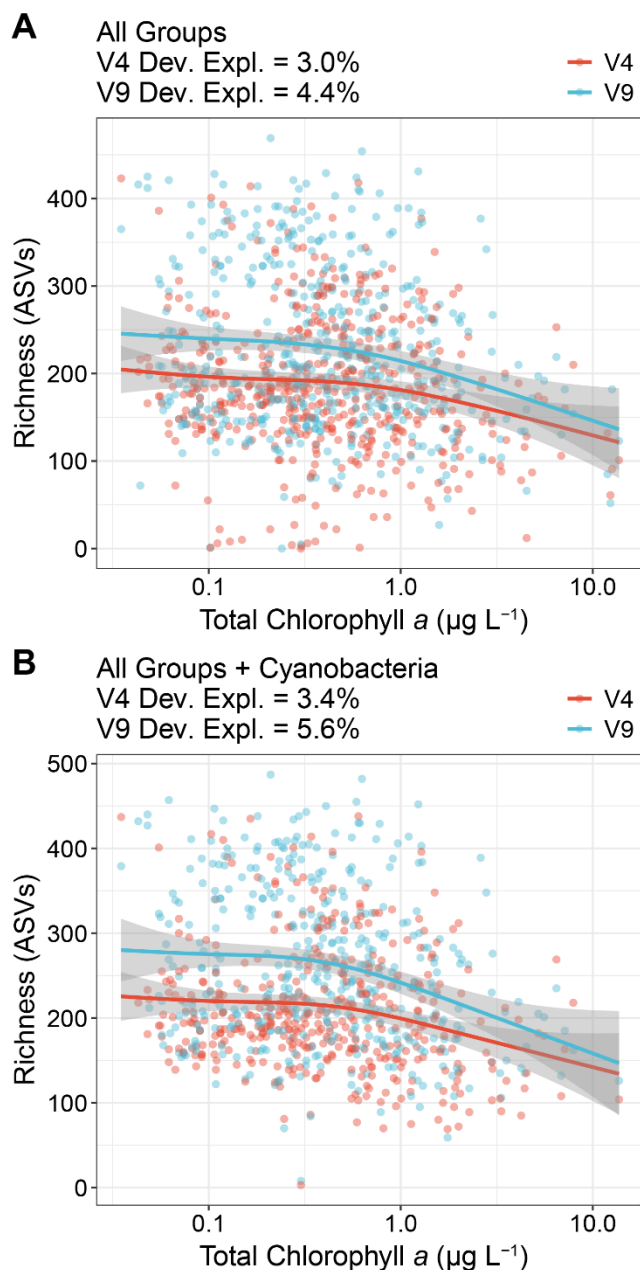

**Figure S10.** Productivity-diversity relationships for each individual phytoplankton groups using richness (ASVs) against taxon-specific biomass estimated with phytoclass. Lines represent GAMs and corresponding 95% confidence intervals where significant ( $P < 0.05$ ). The deviance explained by each GAM or “NS” for not significant ( $P > 0.05$ ) is shown above each panel for each amplicon.

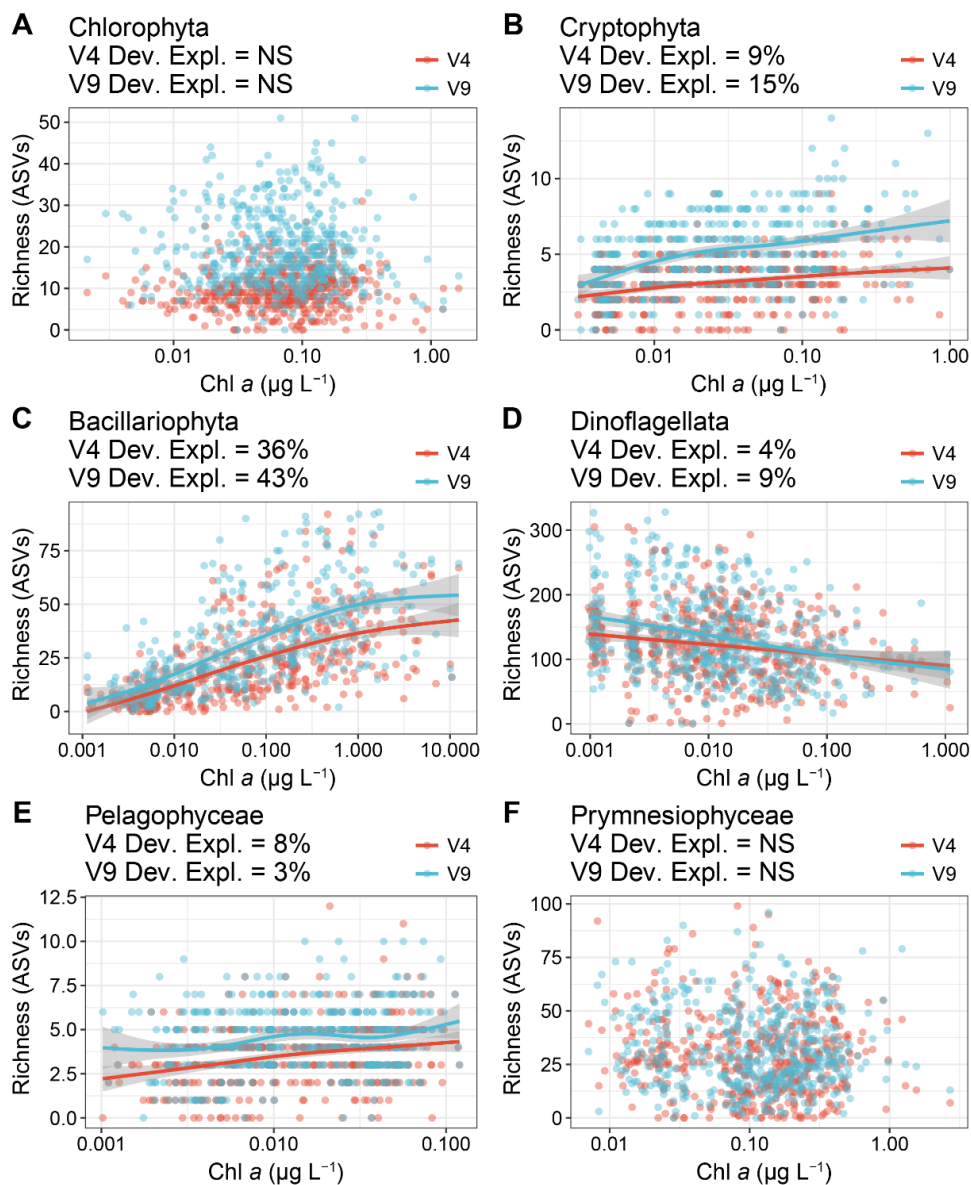

**Figure S11.** Productivity-diversity relationships in the region for all eukaryotic phytoplankton groups except for dinoflagellates with biomass (chlorophyll a concentrations) as a proxy for productivity and diversity expressed as the Shannon Index ( $H'$ ) for both the 18S-V4 (red) and 18S-V9 (blue) data. Lines represent significant GAMs and corresponding 95% confidence intervals ( $P < 0.05$ ). The deviance explained by each GAM is shown above the plot for each amplicon.

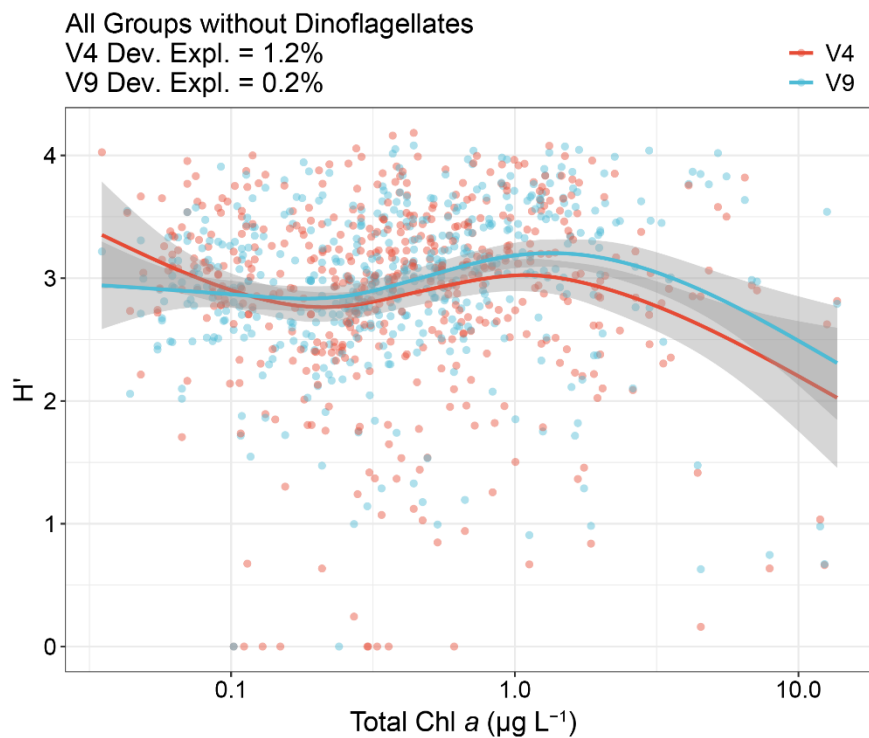

**Figure S12.** Diatom-to-dinoflagellate ratio for the (A) 18S-V4 and (B) 18S-V9 data against total chlorophyll *a* concentrations. The line and 95% confidence interval represent the GAM ( $P < 0.0001$ ) that explains 15.0% (V4) or 18.2% (V9) of the deviance.

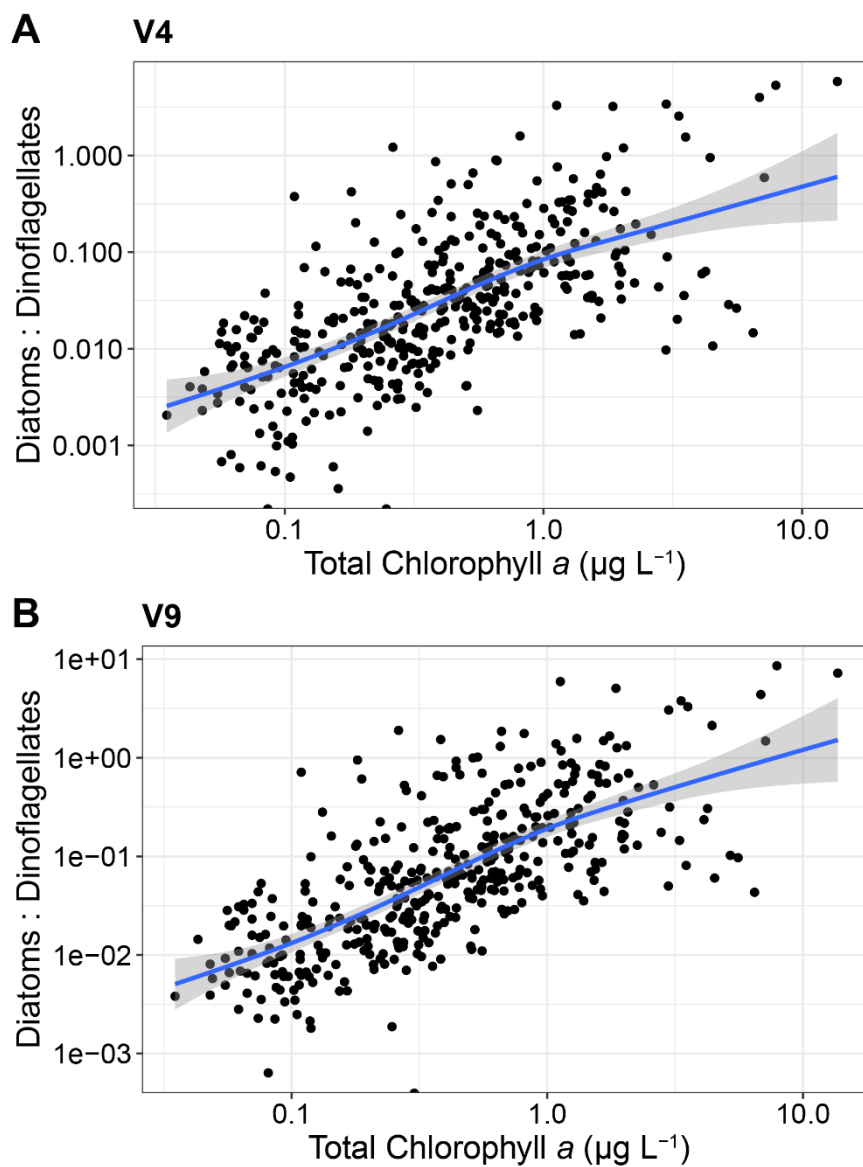

**Figure S13.** Dinoflagellate genus-level abundances against (A) total dinoflagellate copies L<sup>-1</sup>, (B) total chlorophyll *a* concentrations, and (C) peridinin concentrations.

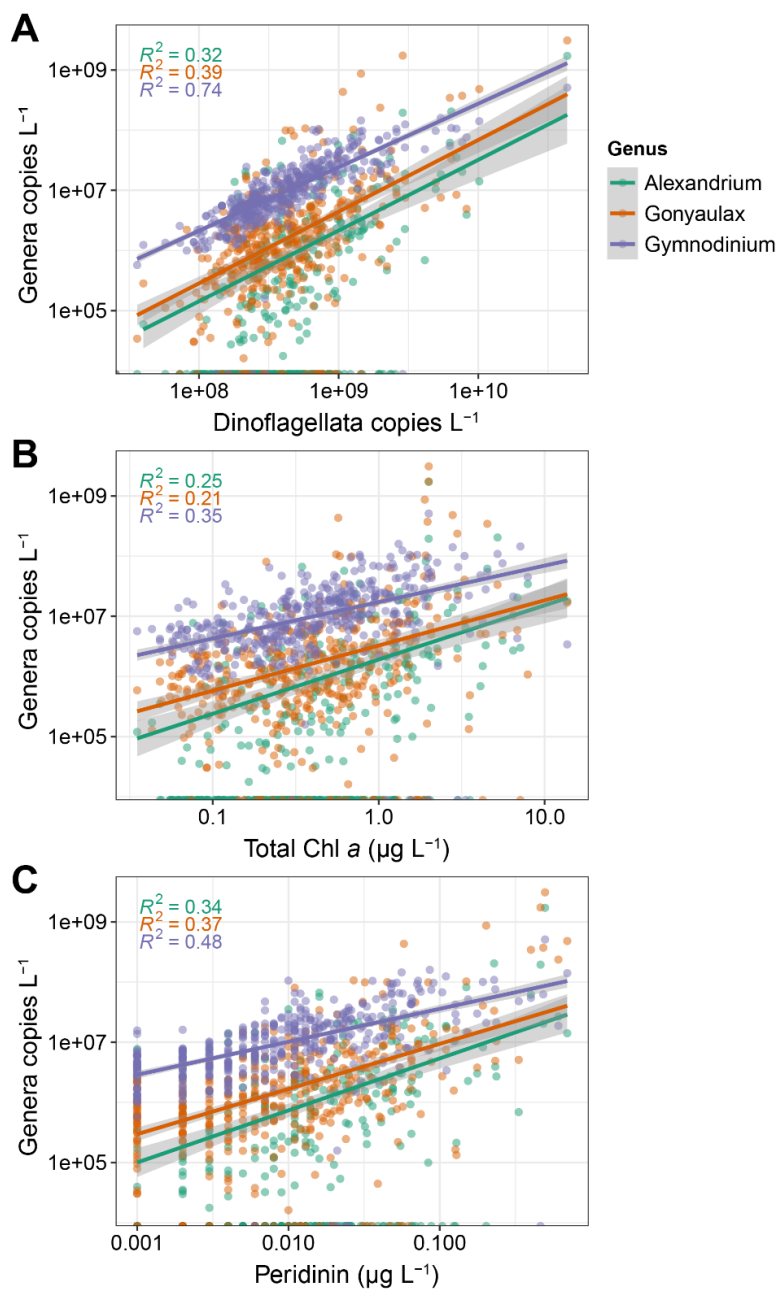

**Table S1.** Pearson correlation coefficients for dinoflagellates with different groups removed and peridinin.

| <b>Removed Group</b> | <b>Amplicon</b> |           |                 |           |
|----------------------|-----------------|-----------|-----------------|-----------|
|                      | <b>Relative</b> |           | <b>Absolute</b> |           |
|                      | <b>V4</b>       | <b>V9</b> | <b>V4</b>       | <b>V9</b> |
| None                 | 0.18            | 0.20      | 0.73            | 0.65      |
| Syndiniales          | 0.42            | 0.35      | 0.77            | 0.70      |
| Kareniceae           | 0.18            | 0.20      | 0.73            | 0.65      |
| Dinophysis           | 0.17            | 0.20      | 0.73            | 0.65      |
